# Supplementary material for: Amplification-free, sequence-specific 16S rRNA detection at 1 aM
Source: Royal Society of Chemistry journal article supplement (doi:10.1039/c8lc00452h), 2018-01-01
Supplement: c8lc00452h1.pdf [file c8lc00452h1.pdf]

## Supplementary Information

### Amplification-Free, Sequence-Specific 16S rRNA Detection at 1 aM

Bonhye Koo<sup>†</sup>, Allison M. Yorita<sup>†</sup>, Jacob J. Schmidt<sup>‡</sup>, and Harold G. Monbouquette<sup>\*†</sup>

<sup>†</sup>Chemical and Biomolecular Engineering Department and <sup>‡</sup>Bioengineering Department, University of California, Los Angeles, CA 90095, United States

Calculations used to estimate the average number of target 16S rRNA molecules hybridized per PNA-bead conjugate and the distribution of hybridized RNA molecules per bead are presented below.

### Estimation of nucleic acids (NAs) hybridized per bead

Based on published studies of equilibrium binding between NA and tethered PNA of similar length to that used here, the dissociation constant,  $K_D$ , was estimated to be  $\sim 10^{-9}$  M.<sup>1,2</sup> This dissociation constant can be used to estimate the concentration of NA-PNA probe complex,  $x$ , that results from the hybridization of NA at an initial concentration,  $[NA]_0$ , with probe at an initial concentration,  $[Probe]_0$ ,

$$K_D = \frac{[NA][Probe]}{x}$$

$$K_D = \frac{([NA]_0 - x)([Probe]_0 - x)}{x}$$

where  $[NA]$  is the concentration of free nucleic acid at equilibrium, and  $[Probe]$  is the concentration of unbound PNA probe at equilibrium. Once  $x$  is determined, it can be used to estimate the order-of-magnitude average number of NA molecules bound per PNA-bead conjugate. The calculation requires input of the average bead diameter, 820 nm; an order of magnitude estimate of PNA surface concentration on the beads,  $10^{14}/\text{cm}^2$  (see text); and a bead number concentration corresponding to a suspension of  $1.26 \times 10^6$  beads in 600  $\mu\text{L}$  (see text).

| NA Concentration | Average NA per bead |
|------------------|---------------------|
| 10 fM            | 1                   |
| 100 aM           | 0.01                |
| 1 aM             | 0.0001              |

**Table S1.** Calculated order-of-magnitude average number of nucleic acids hybridized per PNA-bead conjugate at equilibrium.

Table S1 shows that below 10 fM, the average number of hybridized nucleic acids per PNA-bead conjugate drops below one. In the attomolar range of interest, the average number of NAs per bead drops orders of magnitude below one indicating that the vast majority of beads do not have any bound nucleic acid.

## Estimation of the distribution of NAs per bead using Poisson statistics

Poisson statistics may be used to estimate the probability of finding a certain number of hybridized target nucleic acids per PNA-bead conjugate. The overall defining equation may be expressed as

$$P_{\mu}(v) = e^{-\mu} \frac{\mu^v}{v!}$$

where  $\mu$  is the average number of nucleic acid molecules per bead,  $v$  is the actual number of NAs on an individual bead, and  $P_{\mu}(v)$  is the probability of finding a bead with  $v$  NAs hybridized. Using the dissociation constant calculations in the previous section and given a 1 aM solution of nucleic acid,  $10^{-4}$  molecules are bound per bead on average ( $\mu$ ). Therefore, the probability of finding one NA on a bead is 0.0001 and the probability of finding two NAs on a bead is  $5 \times 10^{-9}$ . Since  $1.26 \times 10^6$  beads were used in the 600  $\mu$ l hybridization volume and 80  $\mu$ l of the bead solution was injected, there were  $\sim 10$  beads with one NA hybridized and essentially no beads with two NA for the experimental runs at 1 aM. Therefore, it appears that one bound NA per bead conjugate was sufficient to cause pore blockage at an applied potential of 1.5 V.

## References

1. K. K. Jensen, H. Orum, P. E. Nielsen and B. Norden, *Biochemistry-US*, 1997, **36**, 5072-5077.
2. A. De, S. Souchelnytskyi, A. van den Berg and E. T. Carlen, *Acs Appl Mater Inter*, 2013, **5**, 4607-4612.
